# Supplementary material for: A highly colorimetric and ratiometric fluorescent probe for the detection of fluoride ions using test strips
Source: Royal Society of Chemistry journal article supplement (doi:10.1039/c9ay01135h), 2019-01-01
Supplement: c9ay01135h1.pdf [file c9ay01135h1.pdf]

# Supporting Information

## A highly colorimetric and ratiometric fluorescent probe for fluoride ion and fluoride ion test-strip

Junwei Shi, Wei Shu, Yulong Wu, Jing Jing \*, Rubo Zhang\* and Xiaoling Zhang \*

Key Laboratory of Cluster Science of Ministry of Education, Beijing Key Laboratory of Photoelectronic/Electrophotonic Conversion Materials, School of Chemistry and Chemical Engineering, Beijing Institute of Technology, Beijing 100081, P. R. China

Corresponding authors E-mail addresses: [zhangxl@bit.edu.cn](mailto:zhangxl@bit.edu.cn); [zhangrubo@bit.edu.cn](mailto:zhangrubo@bit.edu.cn); [hellojane@bit.edu.cn](mailto:hellojane@bit.edu.cn). Fax: +86-10-88875298; Tel: +86-10-88875298.

### Contents

1. The photostability of NP-OTBDPS.
2. The characterization data of TPA-SD.

## 1. The photostability of NP-OTBDPS.

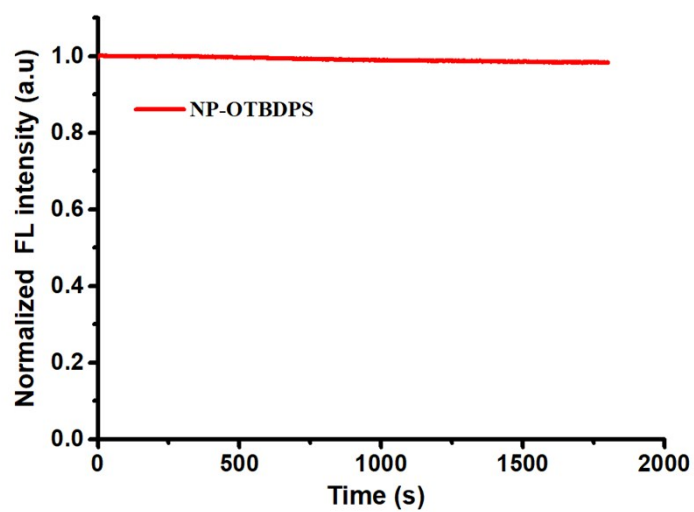

**Fig.S1.** The photostability of the probe (5  $\mu$ M) detected in PBS-DMSO.( v/v = 1/9, pH=7.4, PBS=10 mM).  $\lambda_{ex}$  = 300 nm, Slit width: 5 nm/5 nm.

## 2. The characterization data of NP-OTBDPS.

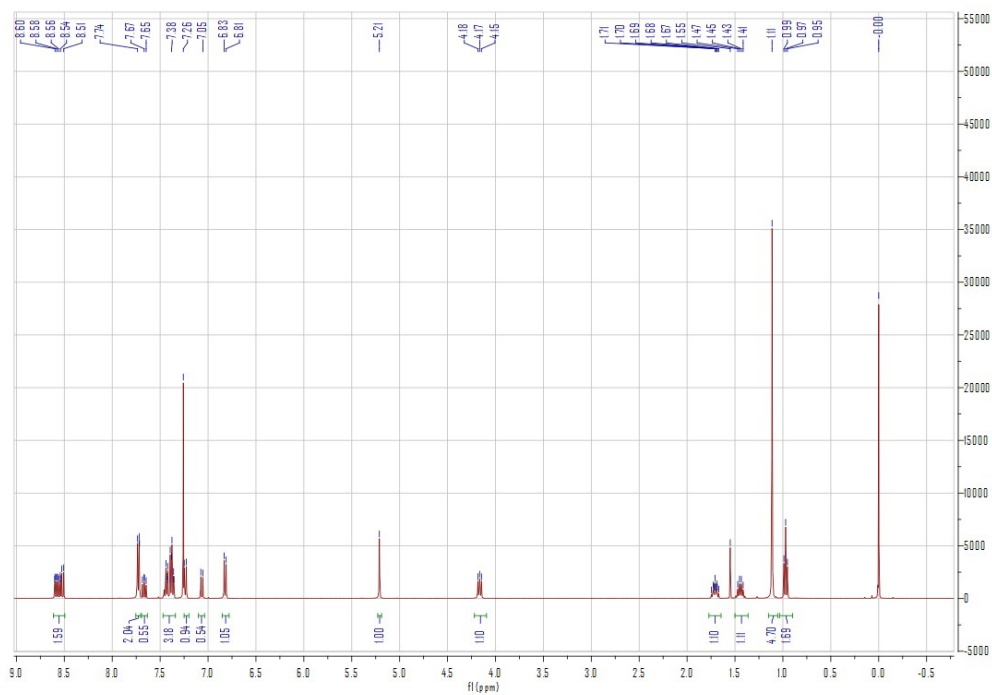

NP-OTBDPS <sup>1</sup>H NMR

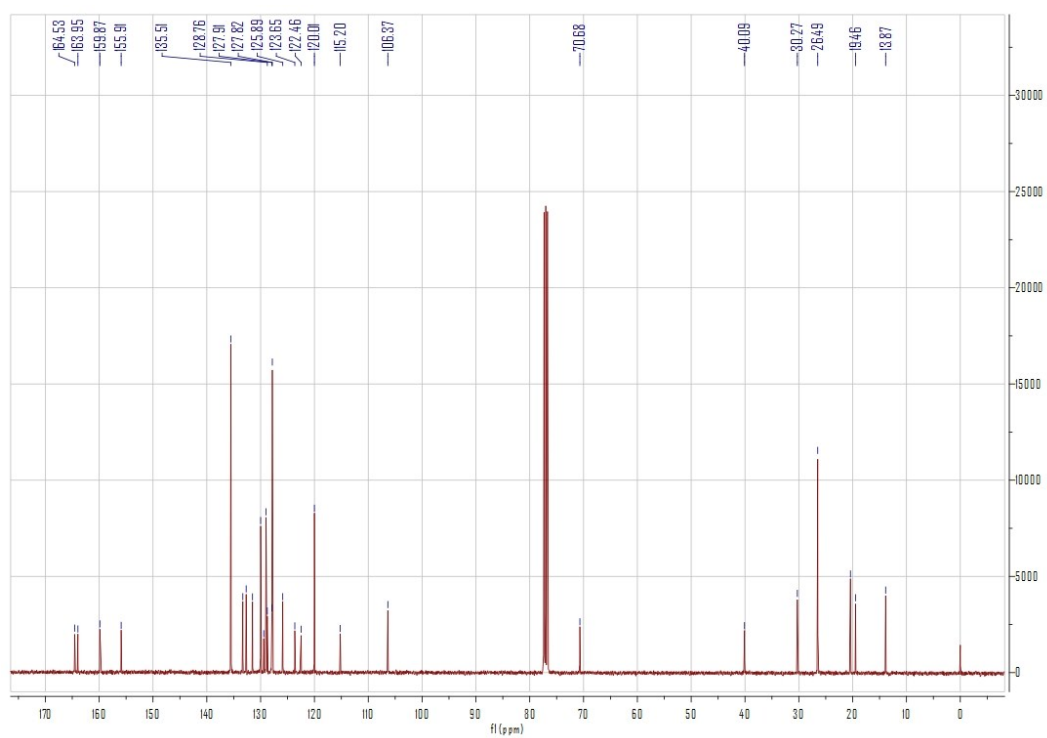

NP-OTBDPS <sup>13</sup>C NMR

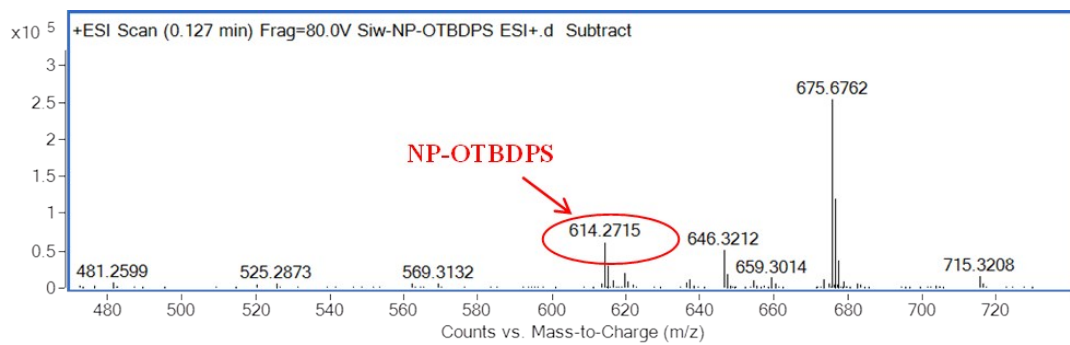

ESI- MS spectrum of **NP-OTBDPS**
